# Supplementary material for: Clinicopathological Significance of RUNX1 in Non-Small Cell Lung Cancer
Source: MDPI journal article supplement (doi:10.3390/jcm9061694), 2020-06-02
Supplement: s1 [file s1]

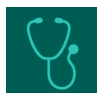

Supplementary Material

# Clinicopathological Significance of *RUNX1* in Non-Small Cell Lung Cancer

Yujin Kim <sup>1</sup>, Bo Bin Lee <sup>1</sup>, Dongho Kim <sup>1</sup>, Sangwon Um <sup>2</sup>, Eun Yoon Cho <sup>3</sup>, Joungho Han <sup>3</sup>, Young Mog Shim <sup>4</sup> and Duk-Hwan Kim <sup>1,\*</sup>

<sup>1</sup> Department of Molecular Cell Biology, Sungkyunkwan University School of Medicine, Suwon 440-746, Korea; yujin0328@hanmail.net (Y.K.), whitebini@hanmail.net (B.B.L.), jindonghao2001@hotmail.com (D.K.)

<sup>2</sup> Department of Internal Medicine, Samsung Medical Center, Sungkyunkwan University School of Medicine Seoul 135-710, Korea; sangwon72.um@samsung.com

<sup>3</sup> Department of Pathology, Samsung Medical Center, Sungkyunkwan University School of Medicine, Seoul 135-710, Korea; eunyocho@samsung.com (E.Y.C.), joungho.han@samsung.com (J.H.)

<sup>4</sup> Department of Thoracic and Cardiovascular Surgery, Samsung Medical Center, Sungkyunkwan University, School of Medicine, Seoul 135-710, Korea

\* Correspondence: dukhwan.kim@samsung.com

Received: 03 May 2020; Accepted: 27 May 2020; Published: date

**Table S1.** Prediction performance of logistic regression model based on three CpGs in a test dataset (N=269) of TCGA lung cancer.

| CpGs       | AUC  | SE   | 95% CI <sup>a</sup> |
|------------|------|------|---------------------|
| cg04228935 | 0.95 | 0.02 | 0.93 - 0.98         |
| cg05000748 | 0.83 | 0.05 | 0.78 - 0.87         |
| cg11498607 | 0.92 | 0.03 | 0.89 - 0.96         |

<sup>a</sup> binomial exact test; Abbreviations: AUC, area under the curve; SE, standard error; CI, confidence interval.

**Table S2.** Clinicopathological characteristics.

| Variables                    | Value (percent) |
|------------------------------|-----------------|
| Age                          | 60 ± 10         |
| Sex                          |                 |
| Male                         | 319 (78%)       |
| Female                       | 90 (22%)        |
| Pack-years                   | 29 ± 26         |
| Smoking                      |                 |
| Never                        | 121 (30%)       |
| Former                       | 59 (14%)        |
| Current                      | 229 (56%)       |
| Pathologic stage             |                 |
| I                            | 158 (39%)       |
| II                           | 148 (36%)       |
| III                          | 101 (25%)       |
| IV                           | 2 (0.005%)      |
| Histology                    |                 |
| Adenoca                      | 189 (46%)       |
| Squamous                     | 192 (47%)       |
| Others                       | 28 (7%)         |
| Differentiation <sup>a</sup> |                 |

|                  |           |
|------------------|-----------|
| Well             | 65 (18%)  |
| Moderately       | 219 (61%) |
| Poorly           | 72 (20%)  |
| Undifferentiated | 5 (1%)    |
| Recurrence       |           |
| No               | 233 (57%) |
| Yes              | 176 (43%) |

Abbreviations: Adenoca, adenocarcinoma; Squamous, squamous cell carcinoma <sup>a</sup> Differentiation data are missing for 48 patients.

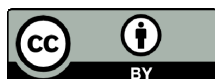

© 2020 by the authors. Submitted for possible open access publication under the terms and conditions of the Creative Commons Attribution (CC BY) license (<http://creativecommons.org/licenses/by/4.0/>).
